# Supplementary material for: Protective Effect of Indole-3-Pyruvate against Ultraviolet B-Induced Damage to Cultured HaCaT Keratinocytes and the Skin of Hairless Mice
Source: PubMed Central journal article supplement (PMC4014565; doi:10.1371/journal.pone.0096804), 2014-05-08
Supplement: pone.0096804.s003.pdf [file pone.0096804.s003.pdf]

Table S1: Primer sequences used for real time RT-PCR.

| Gene                 | Primer sequence |                                 |
|----------------------|-----------------|---------------------------------|
| IL-1 $\beta$ primers |                 |                                 |
| IL-1 $\beta$ (human) | F               | 5'-AAGCTGATGGCCCTAAACAG -3'     |
|                      | R               | 5'-AGGTGCATCGTGACATAAG -3'      |
| IL-1 $\beta$ (mouse) | F               | 5'-CCTTCCAGGATGAGGACATGA -3'    |
|                      | R               | 5'-TGAGTCACAGAGGATGGGCTC -3'    |
| IL-6 primers         |                 |                                 |
| IL-6 (human)         | F               | 5'-CCAGCTATGAACTCCTTCTC - 3'    |
|                      | R               | 5'-GCTTGTTCCTCACATCTCTC - 3'    |
| IL-6 (mouse)         | F               | 5'-GAGGATACCACTCCCAACAGACC -3'  |
|                      | R               | 5'-AAGTGCATCATCGTTGTCATACA - 3' |
| Cox-2 primers        |                 |                                 |
| Cox-2 (human)        | F               | 5'-GAATGGGGTGATGAGCAGTT -3'     |
|                      | R               | 5'-CAGAAGGGCAGGATACAGC -3'      |
| Cox-2 (mouse)        | F               | 5'-CAGACAACATAAACTGCGCCTT -3'   |
|                      | R               | 5'-GATACACCTCTCCACCAATGACC -3'  |
| GAPDH primers        |                 |                                 |
| GAPDH (human)        | F               | 5'-ACCCACTCCTCCACCTTGA-3'       |
|                      | R               | 5'-CTGTTGCTGTAGCCAAATTCGT-3'    |
| GAPDH (mouse)        | F               | 5'-CCCATCACCATCTTCCAGGAGC -3'   |
|                      | R               | 5'-CCAGTGAGCTCCCGTTCAGC -3'     |
| Bax primer           |                 |                                 |
| Bax (mouse)          | F               | 5'-CCCGAGAGGTCTTTTCC -3'        |
|                      | R               | 5'-GCCTTGAGCACCAGTTG -3'        |
